# Supplementary material for: DANNP: an efficient artificial neural network pruning tool
Source: PeerJ journal article supplement (doi:10.7717/peerj-cs.137), 2017-11-06
Supplement: Supplemental_Table_S1.docx [file Supplemental_Table_S1.docx]

| **Dataset** | **# hidden nodes** | **OBS** | **OBS-parallel** | **MWOBS-parallel** | **UOBS-parallel** |
| --- | --- | --- | --- | --- | --- |
| Cardiac arrhythmia (CA) | 10 | 400.157 | 0.00651432 | 0.256434 | 0.496004 |
| 20 | 126.328 | 0.0356527 | 0.424077 | 6.96866 |
| 30 | - | 0.308534 | 0.725519 | 65.5512 |
| 40 | - | 0.810807 | 1.80491 | 141.954 |
| 50 | - | 0.117501 | 3.40837 | 25.2516 |
| 60 | - | 0.11983 | 5.69536 | 407.516 |
| Synthetic madelon (SM) | 10 | - | 6.72978 | 3.0038 | 7.405 |
| 20 | - | 30.867 | 19.8492 | 216.776 |
| 30 | - | 17.3471 | 89.766 | 554.046 |
| 40 | - | 0.421727 | 12.5995 | - |
| 50 | - | 170.992 | 113.539 | - |
| 60 | - | 1.33497 | 27.4508 | - |
| Prostate cancer (PC) | 10 | - | - | 376.063 | - |
| 20 | - | - | 1952.49 | - |
| 30 | - | - | - | - |
| 40 | - | - | - | - |
| 50 | - | - | - | - |
| 60 | - | - | - | - |
| TF-TF combinations (TFTF) | 10 | 338.516 | 20.7987 | 12.1494 | 276.601 |
| 20 | - | 0.196191 | 12.5111 | - |
| 30 | - | 1.96716 | 45.301 | - |
| 40 | - | 454.147 | 1076.76 | - |
| 50 | - | - | 365.301 | - |
| 60 | - | - | 319.374 | - |
| AID886 compounds (AID) | 10 | - | 50.7297 | 9.08566 | 31.955 |
| 20 | - | 1.68469 | 55.3258 | 363.693 |
| 30 | - | 140.212 | 204.971 | - |
| 40 | - | 4.72779 | 197.404 | - |
| 50 | - | 4.60087 | 1945.72 | - |
| 60 | - | 8.46383 | 1603.56 | - |
| Urban land cover (ULC) | 10 | 464.7768 | 1.07412 | 0.123592 | 1.85426 |
| 20 | - | 6.44022 | 1.01067 | 4.6017 |
| 30 | - | 29.207 | 3.29475 | 19.0186 |
| 40 | - | 60.1324 | 7.58816 | 59.1338 |
| 50 | - | 116.33 | 14.3836 | 137.583 |
| 60 | - | 169.308 | 22.0887 | 292.1 |
| Sensorless drive diagnosis (SDD) | 10 | - | 3.31431 | 1.95469 | 2.62411 |
| 20 | - | 5.57916 | 1.72552 | 1.74184 |
| 30 | - | 10.3447 | 2.57005 | 3.72156 |
| 40 | - | 17.3779 | 3.76473 | 6.11066 |
| 50 | - | 22.2942 | 4.17482 | 12.2981 |
| 60 | - | 15.7974 | 4.64598 | 21.1009 |
| MNIST digits (MD) | 10 | - | 3.37083 | 7.14927 | 59.471 |
| 20 | - | - | 205.196 | - |
| 30 | - | - | 435.711 | - |
| 40 | - | - | 1592.59 | - |
| 50 | - | - | 2226.36 | - |
| 60 | - | - | 3597.34 | - |
| Human activity recognition (HAR) | 10 | - | 95.5298 | 2.81631 | 347.799 |
| 20 | - | 163.417 | 15.7963 | 499.941 |
| 30 | - | - | 52.7116 | - |
| 40 | - | - | 141.304 | - |
| 50 | - | - | 314.756 | - |
| 60 | - | - | 598.122 | - |
| Epileptic seizure recognition (ESR) | 10 | - | 0.490211 | 0.20725 | 0.604175 |
| 20 | - | 2.44364 | 0.618436 | 5.78884 |
| 30 | - | 9.70933 | 1.52434 | 31.3226 |
| 40 | - | 20.4855 | 3.66261 | 89.7943 |
| 50 | - | 27.0115 | 4.67485 | 260.363 |
| 60 | - | 53.5402 | 7.14322 | 431.476 |
| LSVT voice rehabilitation (LSVT) | 10 | 305.1786 | 1.8109 | 0.900769 | 5.1195 |
| 20 | - | 13.9384 | 2.13578 | 32.3879 |
| 30 | - | 32.8101 | 6.68512 | 64.9367 |
| 40 | - | 64.9756 | 26.618 | 452.062 |
| 50 | - | 148.976 | 70.6311 | - |
| 60 | - | 212.867 | 30.2891 | - |
| Default credit cards (DCC) | 10 | 4.12035 | 0.0694566 | 0.118 | 0.0384556 |
| 20 | 18.5835 | 0.254763 | 0.193 | 0.096711 |
| 30 | 6.82576 | 0.17173 | 0.302 | 0.175714 |
| 40 | 56.6648 | 0.0680848 | 0.080 | 0.544578 |
| 50 | 279.783 | 0.186679 | 0.315 | 0.192919 |
| 60 | - | 0.738888 | 0.232 | 0.947745 |
